Running title: The  $p$ -factor in childhood

# **The General Psychopathology Factor from Early to Middle Childhood: Longitudinal Genetic and Risk Analyses**

Reut Avinun, Ariel Knafo-Noam, and Salomon Israel

Department of Psychology, The Hebrew University of Jerusalem, Israel

1 **Abstract**

2 Accumulating research suggests the structure of psychopathology is best represented  
3 by continuous higher-order dimensions, including a general dimension, *p*-factor, and  
4 more specific dimensions, e.g., residualized externalizing and internalizing factors.  
5 Here, we aimed to 1) replicate *p* in early childhood; 2) externally validate the factors  
6 with key constructs of psychological functioning; 3) examine stability and change of  
7 genetic and environmental influences on the psychopathology factors from early- to  
8 mid-childhood; 4) examine the factors' predictive utility; and 5) test whether the  
9 factors can be predicted by early life measures (e.g., neonatal complications). The  
10 Longitudinal Israeli Study of Twins from age 3 to 9 was used for the analyses.  
11 Mothers reported on developmental problems, pregnancy and neonatal conditions, and  
12 filled in questionnaires on each twin's externalizing and internalizing symptoms.  
13 Cognitive ability was assessed in the lab at age 6.5 and personality traits, self-esteem,  
14 and life satisfaction were self-reported by the twins at ages 11-13. A bifactor model  
15 that included *p* and externalizing and internalizing factors fit the data best and  
16 associations between *p*, cognitive ability, and personality were replicated.  
17 Longitudinal twin analyses indicated that *p* is highly heritable (64-73%) with a  
18 substantial proportion of the genetic influences stable from age 3. The residualized  
19 internalizing and externalizing factors were also highly heritable. Higher *p* predicted  
20 developmental problems at age 8-9 and lower self-esteem at age 11. Early life  
21 measures were not strongly associated with psychopathology. Our results show that *p*  
22 is discernible in early childhood, highly heritable, and prospectively associated with  
23 negative outcomes.

24

25 **Keywords:** Psychopathology; childhood; general psychopathology factor; *p*-factor;  
26 heritability; longitudinal.

27

## 28 **General Scientific Summary**

29 The general psychopathology factor is discernible in early childhood, highly heritable,  
30 with genetic influences contributing to both stability and change, and prospectively  
31 associated with developmental problems and lower self-esteem. Early life measures,  
32 such as birth complications or hospitalizations during the first year of life, were not  
33 strong predictors of the general psychopathology factor or the residualized  
34 externalizing and internalizing factors.

35

36

37 Comorbidity of psychopathology is prevalent. About 40% of individuals with one  
38 class of disorders (e.g., mood, anxiety, substance abuse) are likely to be diagnosed  
39 with another (Merikangas et al., 2010; Newman, Moffitt, Caspi, & Silva, 1998). As a  
40 result of this co-occurrence, instead of discrete mental disorders, researchers have  
41 begun to conceptualize the structure of psychopathology as consisting of broad  
42 transdiagnostic dimensions, including externalizing (e.g., hyperactivity and antisocial  
43 behavior), internalizing (e.g., depression and anxiety), and thought disorders  
44 (schizophrenia and obsessive compulsive disorder). Accumulating evidence has  
45 suggested that in addition to specific factors, such as externalizing and internalizing, a  
46 general psychopathology factor, often called  $p$  (Caspi et al., 2014), is also needed to  
47 represent the structure of psychopathology (Lahey et al., 2012). The  $p$ -factor captures  
48 shared variation across most, if not all, types of psychopathology and is thought to  
49 represent a general liability for mental disorders, as well as their persistence and  
50 severity (Caspi & Moffitt, 2018).

51 The  $p$ -factor has been identified in various age groups, from preschoolers to  
52 adolescents and adults; in clinical and general population samples; in different  
53 countries; and using different methods and measures (e.g., Caspi et al., 2014; Gomez,  
54 Stavropoulos, Vance, & Griffiths, 2019; Hyland et al., 2018; Laceulle, Chung,  
55 Vollebergh, & Ormel, 2020; Olino, Dougherty, Bufferd, Carlson, & Klein, 2014;  
56 Patalay et al., 2015; Snyder, Young, & Hankin, 2017). To characterize and validate  
57 the  $p$ -factor, researchers have examined its association with broadly informative  
58 indicators of psychological functioning such as personality traits and cognitive ability.  
59 In early and middle adulthood, the  $p$ -factor has been found to correlate positively with  
60 neuroticism and negatively with agreeableness and conscientiousness (e.g., Avinun,  
61 Romer, & Israel, 2020; Caspi et al., 2014; Etkin, Mezquita, López-Fernández, Ortet,

62 & Ibáñez, 2020). Correlations between the  $p$ -factor and measures relating to cognitive  
63 ability and executive function have been found to be negative in middle childhood  
64 (Martel et al., 2017), early-adolescence (Patalay et al., 2015), and adulthood (Caspi et  
65 al., 2014).

66 Further supporting the  $p$ -factor's reliability are genetic studies showing that the  
67  $p$ -factor is genetically influenced, i.e., not only explained by noise and measurement  
68 error, and that these genetic influences are relatively stable across time (Allegrini et  
69 al., 2020; Riglin et al., 2019; Selzam, Coleman, Caspi, Moffitt, & Plomin, 2018). A  
70 longitudinal twin analysis from childhood (age 7 years) to adolescence (age 16 years),  
71 has shown that the  $p$ -factor is substantially heritable (50-60%) across ages and that the  
72 genetic component is relatively stable, so that the genetic influence at age 7 accounts  
73 for most of the genetic variance in later ages (Allegrini et al., 2020). Notably, to our  
74 knowledge, the latter study is the only study to date that employed a longitudinal twin  
75 design to examine change and stability in the genetic and environmental effects on the  
76  $p$ -factor, and no study has examined the specific/residualized factors (e.g.,  
77 externalizing and internalizing). Additional developmental research is therefore  
78 warranted, especially during early life when executive functions, which are  
79 significantly linked to externalizing and internalizing symptoms (Hughes & Ensor,  
80 2011), rapidly develop.

81 The  $p$ -factor has also been shown to predict negative outcomes (e.g., Blanco et  
82 al., 2019; Lahey et al., 2015). For example, estimates of the  $p$ -factor in middle  
83 childhood and early adolescence predict psychiatric diagnoses (anxiety, depression,  
84 and alcohol and drug use disorders), use of anxiolytics and antidepressants, school  
85 failure, and court convictions in adolescence (Pettersson, Lahey, Larsson, &  
86 Lichtenstein, 2018). Taken together, the above findings support the reliability and

87 validity of the *p*-factor as a common variance that captures an inherent and general  
88 risk for psychopathology.

89         Although the shared variance across mental disorders is a robust and replicable  
90 finding, the mechanisms that underlie this general risk are less clear and longitudinal  
91 studies are scarce. While various candidates likely play a role in the etiology of the *p*-  
92 factor, of special interest perhaps, are those that are present at or around birth, as  
93 previous studies suggest that the *p*-factor can be found early in development, in  
94 children as young as 4 years old (Morales et al., 2021). For example, the link between  
95 the *p*-factor in adulthood and childhood socioeconomic status (SES) has been  
96 examined, as studies have shown that children raised in families with low SES show  
97 increased risk for psychopathology (Peverill et al., 2020), particularly externalizing  
98 behaviors. Interestingly, at least one study has found the correlation between the *p*-  
99 factor and childhood SES to be weak (Caspi et al., 2014).

100         Pregnancy, obstetric, and neonatal complications have previously been  
101 identified as increasing risk for poorer mental health and/or poorer cognitive function  
102 (De Mola, De França, de Avila Quevedo, & Horta, 2014; Ehrenstein et al., 2009;  
103 Hamlyn, Duhig, McGrath, & Scott, 2013; Van Lieshout & Voruganti, 2008). For  
104 example, Chiorean and colleagues (2020) found that children admitted to  
105 neonatal/special care units at birth were more likely to develop a psychiatric disorder  
106 in adolescence. Similarly, preterm birth has been associated with increased risk of  
107 psychiatric hospitalizations in young adulthood (Nosarti et al., 2012), and  
108 pregnancy/birth complications (e.g., prenatal bleeding, hypertension and diabetes,  
109 breech birth, and instrument delivery) have been associated with externalizing  
110 problems at age 11 (Liu, Raine, Wuerker, Venables, & Mednick, 2009). Because

111 these factors are not necessarily specific to any particular psychopathology, they may  
112 serve as transdiagnostic risk factors.

113 In the current study, we test the replicability of the general psychopathology  
114 factor finding from early to middle childhood (e.g., Hankin et al., 2017; Olino et al.,  
115 2014), on a longitudinal sample of twins followed from age 3 to age 9. Next, we  
116 evaluate the external validity of  $p$  and the specific/residualized externalizing and  
117 internalizing factors by testing for associations with personality traits and cognitive  
118 ability, and examine if/how these associations change during development. Following  
119 these analyses, we conduct a genetically informed longitudinal analysis from early to  
120 middle childhood to examine stability and change of the genetic and environmental  
121 influences on the psychopathology factors. This analysis can provide further support  
122 for the reliability of the factors by showing their stability across time. We next tested  
123 the predictive value of the three factors in the context of developmental problems at  
124 age 8-9 (whether the child suffers from e.g., stammering, speech delay, and  
125 emotional, social, or communication problems), self-esteem at age 11, and life  
126 satisfaction at age 13. Finally, we conducted exploratory analyses to examine whether  
127 measures that can be assessed early in the child's life, such as SES at age 3 and  
128 pregnancy, obstetric, and neonatal complications, can predict the psychopathology  
129 factors. We hypothesized that risk measures, such as low SES, low birth weight and  
130 complications of pregnancy (e.g., rubella, RH mismatch, bleeding during pregnancy  
131 or miscarriage risk, and preeclampsia), will be associated with higher scores of the  
132 psychopathology factors.

133

134

## Methods

135 **Participants**

136 Families in this study were participants in the Longitudinal Israeli Study of Twins  
137 (LIST), a study of social development, in which parents of all Hebrew-speaking  
138 families of twins born in Israel during 2004-2005 were invited to participate (Avinun  
139 & Knafo, 2013; Vertsberger, Abramson, & Knafo-Noam, 2019). At each wave the  
140 experimental protocol was approved by the ethics committee of either the university  
141 or the local hospital, and informed consent was obtained from all participating  
142 parents. Mothers were asked to complete questionnaires regarding their pregnancy  
143 (only age 3 and 5), demographic details, and children's development, when the twins  
144 were 3, 5, 6.5, and 8-9 years old. Data for this study was available for 2,770 children  
145 at age 3 (M=3.16 years, SD=.26; 50.3% males; 582 MZ [monozygotic], 2,164 DZ  
146 [dizygotic], and 24 of unknown zygosity), 1,908 at age 5 (M=5.13 years, SD=.14;  
147 51% males; 370 MZ, 1,518 DZ, and 20 of unknown zygosity), 1,020 at age 6.5  
148 (M=6.57 years, SD=.30; 50% males; 285 MZ, 729 DZ, and 6 of unknown zygosity),  
149 and 973 at age 8-9 (M=9.01 years, SD=.52; 48.7% males; 260 MZ, 699 DZ, and 14 of  
150 unknown zygosity). Due to design and budgetary constraints, at ages 6.5 and 8-9 only  
151 a small number of opposite-sex DZ twins and only families with which it was possible  
152 to schedule an in-person experiment were recruited. Twins' zygosity was determined  
153 based on either a DNA analysis or a parental questionnaire of physical similarity,  
154 which has been shown to be in 95% agreement with DNA information (Goldsmith,  
155 1991).

156 About 25% of the age 3 families did not participate in later waves, a comparison  
157 of this group of families to families that did participate in at least one more wave is  
158 shown in Supporting Table 1. There were no significant differences in the means of  
159 SES or mother reports of children's psychopathology (the assessment of these  
160 measures is detailed below. Comparisons were made in Mplus version 7, using the



161 type=complex with the 'cluster' option, to account for the dependent structure of the  
162 data).

163

## 164 **Measures**

### 165 *Psychopathology*

166 Similar to a previous study in childhood that relied on symptom-level, instead of  
167 disorder-level, scores (Patalay et al., 2015), items from 2 different questionnaires were  
168 used for the assessment of psychopathology. Internalizing symptoms were assessed in  
169 the four waves by mothers' ratings of 5 items from the emotional symptoms subscale  
170 of the Strengths and Difficulties Questionnaire (SDQ; Goodman, 1997) and 5 items  
171 from the negative emotionality subscale of the Emotionality, Activity and Sociability  
172 Temperament Survey (Buss & Plomin, 1984). Ratings were given on a 3-point scale  
173 ranging from 0 (not true/rare) to 2 (very true/often) or on a 5-point scale ranging from  
174 1 (does not characterize at all) to 5 (highly characterizes), respectively. Externalizing  
175 symptoms were assessed in the four waves by mothers' ratings of 10 items from the  
176 SDQ (Goodman, 1997). The 10 items were taken from the hyperactivity subscale (5  
177 items) and the conduct problems subscale (5 items).

178

### 179 *Socioeconomic status*

180 SES was calculated from mother reports when children were 3 based on the number  
181 of rooms/number of residents' ratio, income (reported on a scale from 1-considerably  
182 below average to 5-considerably above average, with 3 representing the national average),  
183 and mother's years of education. These variables were standardized and then averaged  
184 (e.g., Avinun & Knafo-Noam, 2017).

185

186 *Pregnancy and delivery information*

187 When the twins were 3 and 5, mothers provided details regarding complications  
188 during pregnancy and/or delivery (e.g., rubella, RH mismatch, bleeding during  
189 pregnancy or miscarriage risk, preeclampsia, gestational diabetes, high risk  
190 pregnancy/bed rest, hospitalizations, umbilical cord prolapse, breech birth, assisted  
191 delivery, and placental abruption) and neonatal problems of each twin (neonatal  
192 hepatitis, neonatal diabetes, and being in an incubator). Complications during  
193 pregnancy/delivery and neonatal problems were summary scores of all relevant yes/no  
194 questions. Additional information that we included in our analyses: total weeks of  
195 pregnancy, Apgar scores of each twin 1- and 5-minutes after birth, whether each twin  
196 was hospitalized in the first year of life or afterwards, and breastfeeding (whether they  
197 breastfed each twin). Notably, maternal recall 4 to 6 years later regarding perinatal  
198 events has been found to be 89% accurate in comparison with hospital records  
199 (Githens, Glass, Sloan, & Entman, 1993).

200

201 *Developmental problems*

202 At all ages (i.e., 3, 5, 6.5, and 8-9) mothers were asked whether either twin suffered  
203 from developmental problems (e.g., stammering, speech delay, emotional, social, or  
204 communication problems, hypotonia or hypertonia, difficulty with gross/fine motor  
205 skills, behavior problems, hearing/vision impairment, attention/hyperactivity  
206 problems, eating problems, and wetting/toilet training problems). This was coded as 0  
207 or 1.

208

209 *Cognitive ability*

210 The Block Design (visual processing) and the Vocabulary (crystallized intelligence)  
211 subsets of the Wechsler Intelligence Scale for Children-IV (WISC-IV; Lerner &  
212 Miller, 1978) were used to assess cognitive ability. The Block design subset includes  
213 14 items and participants are asked to assemble blocks under a time limit, based on a  
214 pattern that is shown by the examiner. The Block design is scored based on accuracy  
215 and time. The vocabulary subset includes 37 items and participants are asked to  
216 explain a word using their own words. Scores reflect the accuracy of their definition.  
217 A mean of the two subsets' scores was used as a cognitive ability score. Both subsets  
218 were administered at the lab or at the children's homes when the twins were 6.5 years  
219 old.

220

### 221 *Personality*

222 At age 11 the twins were asked to fill in the Big Five Inventory (BFI) questionnaire  
223 (John, Donahue, & Kentle, 1991) either online or by hand. The BFI includes 44 items  
224 (e.g., "I am sometimes rude to others") used to assess individual differences along the  
225 five-factor model of personality: neuroticism, extraversion, openness,  
226 conscientiousness, and agreeableness. Each scale was measured using 8-9 items, and  
227 an average requiring at least 5 non-missing items was calculated for each trait. Data  
228 was available for 1,349 children.

229

### 230 *Self-Esteem*

231 At age 11 the twins were asked to fill in the Rosenberg Self-Esteem Scale (Rosenberg,  
232 1965) either online or by hand. The 10 items of the questionnaire (e.g., "I wish I could  
233 have more respect for myself") were summed to create a self-esteem score. Data was  
234 available for 1,106 children.

235

236 *Life satisfaction*

237 At age 13 the twins were asked to fill in 4 items ("my life is going well", "my life is  
238 just right", "I have a good life", and " I have what I want in life") taken from the  
239 Student's Life Satisfaction Scale (Huebner, 1991). A mean of the 4 items (with a  
240 minimum of 3 items) was used as a life satisfaction score. Data was available for 703  
241 children.

242

243 **Statistical analyses**

244 *Replication of the p-factor/Verifying the bifactor model*

245 The same 20 items representing internalizing and externalizing symptoms were used  
246 for the factor analyses at each age, to allow developmental analyses and unambiguous  
247 comparisons across waves (as previously done, e.g., Murray, Eisner, & Ribeaud,  
248 2016). The items were defined as categorical, which is needed in Mplus to indicate  
249 that they should be treated as ordinal variables in the model. As previously done  
250 (Avinun et al., 2020; Caspi et al., 2014; Romer et al., 2018), we used confirmatory  
251 factor analysis to fit three structural models: 1) A bifactor/hierarchical model, which  
252 consists of a *p*-factor that loads on all items, and two additional factors that are  
253 allowed to correlate, each loading separately on either internalizing or externalizing  
254 symptom items; 2) A one factor model, which consists of a factor that loads on all  
255 items; and 3) A correlated factor model, which consists of only two factors, each  
256 loading separately on either internalizing or externalizing symptom items. All  
257 confirmatory factor analyses were performed in Mplus version 7 (Muthén & Muthén,  
258 2007) using the weighted least squares means and variance adjusted (WLSMV)  
259 algorithm, which is appropriate for ordinal data, and type=complex with the 'cluster'

260 option, to account for the structure of the data (i.e., twins nested within families). This  
261 was done for each age (i.e., 3, 5, 6.5, and 8-9) separately.

262 We assessed how well each of the three models (one factor, correlated factors,  
263 and bifactor model) fit the data using the comparative fit index (CFI), the Tucker-  
264 Lewis index (TLI), and the root-mean square error of approximation (RMSEA). CFI  
265 and TLI closer to 1 and RMSEA closer to 0 indicate good fit (Hu & Bentler, 1999).

266

#### 267 *Externally validating the psychopathology factors*

268 To test the external validity of the psychopathology factors, we examined the  
269 association between the three factor scores and previously identified correlates of  
270 psychological functioning: sex, personality traits and cognitive ability. All analyses  
271 were done in R version 4.0.3 (R Core Team, 2020). The package 'geepack' (Halekoh,  
272 Højsgaard, & Yan, 2006) was used to conduct linear regression analyses with  
273 generalized estimating equations (GEE) with an "exchangeable" correlation structure,  
274 due to the cluster structure of the data (i.e., families). The factors were entered as  
275 independent variables in separate analyses, and either personality traits (age 11) or  
276 cognitive ability (age 6.5) were entered as the dependent variables. In the analyses of  
277 sex, sex was entered as the independent variable. All models were tested separately.

278

#### 279 *Longitudinal twin analysis/Cholesky decomposition model*

280 To test stability and change of the genetic and environmental influences on the  
281 psychopathology factors from age 3 to age 8-9 a longitudinal twin analysis/Cholesky  
282 decomposition model was conducted. Analyses were done in R version 4.0.3 (R Core  
283 Team, 2020) with the "openMx" (Neale et al., 2016) and "umx" (Bates, Neale, &  
284 Maes, 2016) packages and in the model-fitting program Mx version 1.70a (Neale,

285 Boker, Xie, & Maes, 2003). Twin studies take advantage of the genetic difference  
286 between MZ twins, who share 100% of their genes, and DZ twins, who share on  
287 average 50% of their genes. The twin design assumes that if MZ twins are more  
288 similar than DZ twins then the individual differences in the examined phenotype are  
289 genetically influenced. These genetic influences can be represented by additive (A)  
290 and non-additive/dominant (D) genetic effects. Similarity beyond these genetic  
291 influences is attributed to the environment the twins share (shared or common  
292 environmental effects, C), and any differences between the twins are ascribed to the  
293 non-shared environment, which also includes measurement error (E). In a model that  
294 only includes reared-together twins, it is not possible to estimate D and C  
295 simultaneously. Therefore, when the presence of the D component is suggested (i.e.,  
296 the MZ correlation is more than twice as large than the DZ correlation), an ADE  
297 model needs to be estimated instead of an ACE model. When DZ correlations are  
298 negative, a model that also includes a contrast effect has been suggested (Saudino,  
299 Cherny, & Plomin, 2000), as will be explained below.

300 In a longitudinal genetic model, a heritability component named A1 is created  
301 that estimates the variance explained by genetic influences on the first  $p$ -factor (age  
302 3). The contribution of A1 to the  $p$ -factors at later ages (i.e., 5, 6.5, and 8-9) is also  
303 estimated, providing an indication of the stability of genetic influences across early  
304 development. Similarly, a heritability component named A2 is created that assesses  
305 the variance explained by genetic influences that are not accounted for by A1 and that  
306 affect the second (i.e., age 5  $p$ -factor) and successive waves (i.e., ages 6.5 and 8-9).  
307 This is done for each age and for each of the model's components (e.g., A, C, and E).  
308 Notably, when certain components are estimated to be very low, constrained models,  
309 in which these components are equated to zero, are fitted (e.g., an AE or a DE model).

310 A best fitting model can be chosen based on the lowest Akaike information criterion  
311 (AIC).

312

313 *The psychopathology factors as predictors and Predicting the psychopathology*  
314 *factors*

315 Associations between the psychopathology factors and related measures were also  
316 performed in R in GEE models as explained above in the *Validating the p-factor*  
317 section (when developmental problems at age 8-9 were tested as the dependent  
318 variable, a logistic regression with GEE was performed). Here, sex (coded as  
319 1=males, 2=female), age, and SES at age 3 were used as covariates.

320

321

## Results

322 Descriptive statistics are available in Supporting Table 2.

323

324 *Replication of the p-factor/Verifying the bifactor model*

325 At all four ages, the structural model that fit the data best and showed adequate to  
326 good fit was the bifactor model; this was evidenced by the highest CFI and TLI scores  
327 and the lowest RMSEA value among the three models (Supporting Table 3). Factor  
328 scores from the bifactor model at each age were extracted and used in following  
329 analyses. The items and their standardized loadings on each factor are presented in  
330 Supporting Table 3. The strength of the loading on each item was relatively consistent  
331 between early and middle childhood, so that items with higher loadings on the *p-*  
332 factor at age 3 had higher loadings in all 4 waves (the correlations between the factor  
333 loadings at each age ranged between .97 and .98).

334 We examined longitudinal invariance of the  $p$ -factor by constraining the  $p$ -  
335 factor loadings to equal across ages and comparing this nested model to the  
336 unconstrained model. As in the original models, all means were fixed at 0 and the  
337 variances were fixed at 1, for model identification and standardization of the factors.  
338 To compare the models, we employed the DIFFTEST option in Mplus, which enables  
339 a chi-square difference test analysis when the WLSMV estimators is used. The  
340 difference test was significant ( $\chi^2$  diff (60)=138.66,  $p<.0001$ ), however, the RMSEA  
341 (.018), CFI (.914), and TLI (.909) in the unconstrained model were similar to the  
342 RMSEA (.017), CFI (.919), and TLI (.915) of the nested model. Therefore, and taking  
343 into consideration that chi-square tests are considered overly conservative in large  
344 sample sizes, it can be concluded that the  $p$ -factor is relatively stable during  
345 childhood. This is also supported by the correlations between the  $p$ , externalizing, and  
346 internalizing factor scores across ages (shown in Figure 1A. For purposes of the  
347 figure, we limited the sample to one random twin in each family to avoid dependency  
348 and allow a simple presentation). The correlations between the  $p$ -factor at different  
349 ages were consistently moderate to high ( $r=.45-.68$ ). Correlations between the  
350 internalizing factors ( $r=.37-.58$ ) and between the externalizing factors ( $r=.34-.67$ )  
351 were of similar magnitude.

352

### 353 *Externally validating the psychopathology factors*

354 Patterns of association were examined across childhood between the psychopathology  
355 factors ( $p$ , externalizing, and internalizing), the big five personality traits (self-  
356 reports), cognitive ability (lab assessment), and sex. The psychopathology factors at  
357 each age were analyzed separately. Results are presented in Table 1 and Supporting  
358 Table 4. As expected, children with higher  $p$ -factor scores, tended to rate themselves



359 as less agreeable, less conscientious, and more neurotic. Children with higher  
360 internalizing factor scores rated themselves as less extraverted and more neurotic,  
361 while children with higher externalizing factor scores rated themselves as more  
362 extraverted and less conscientious.

363 Across ages 3 to 8-9, boys had higher  $p$ -factor scores than girls. Boys were also  
364 characterized by higher externalizing factor scores than girls, while girls tended to  
365 score higher on the internalizing factor, although this latter association was weak and  
366 inconsistent across ages. Cognitive ability, as assessed at age 6.5, showed the  
367 strongest negative association with the externalizing factor ( $R^2$  between .007 and  
368 .058), and only weak and inconsistent associations with  $p$  and the internalizing factor  
369 ( $R^2$  between 0 and .005).

370

#### 371 *Longitudinal twin analysis/Cholesky decomposition model*

372 Twin correlations for the psychopathology factors from early to middle childhood are  
373 presented in Figure 1B. MZ twin correlations were consistently higher than DZ twin  
374 correlations. Notably, in the case of the specific/residualized externalizing factor, DZ  
375 correlations were negative and weak, whereas MZ correlations were consistently  
376 moderate and ranged between .43 to .49. Sensitivity analyses showed that regressing  
377 the psychopathology factors on sex or excluding the DZ-opposite sex twins did not  
378 lead to meaningful changes in the correlations between MZ and DZ twins (Supporting  
379 Table 5).

380 For the  $p$ -factor the AE model fit the data best (Supporting Table 6) and is  
381 presented in Figure 2A (estimates with 95% confidence intervals are presented in  
382 Supporting Table 7A; because the difference in fit was small, an ADE model is also  
383 presented in Supporting Table 7B). The analysis indicated that the genetic influences

384 on the  $p$ -factor are substantial and relatively stable in size (total heritability at each  
385 age ranged from .64 to .73), and that although new genetic influences arise at each  
386 age, a major proportion of the genetic influence is already present at age 3, and  
387 persists throughout childhood.

388 As mentioned above, for the externalizing factor, DZ correlations were  
389 negative. Negative DZ twin correlations have been observed in previous studies (e.g.,  
390 Goodman & Stevenson, 1989; Plomin et al., 1993), and specifically for hyperactivity  
391 (Thapar, Holmes, Poulton, & Harrington, 1999). Such correlations are thought to arise  
392 due to a contrast effect, which, in the case of negative DZ correlations, likely  
393 represents a bias in parent ratings (Saudino et al., 2000). In genetically influenced  
394 traits, DZ twins are expected to be more different than MZ twins. A contrast effect  
395 describes a situation in which parents exaggerate the existing difference between DZ  
396 twins. In addition to negative DZ correlations, a contrast effect is suggested when the  
397 DZs variance is greater than the MZs variance (Saudino et al., 2000). In our sample,  
398 the externalizing factor variance was consistently greater in DZs compared to MZs,  
399 although the differences were only significant in ages 3 and 5 (Supporting Table 8).

400 Based on the above, we opted to test a model for the externalizing factor that  
401 also accounts for a contrast effect (i.e., a path at each age from each twin's phenotype  
402 to the phenotype of their co-twin. This path indicates that each twin's phenotype is  
403 also a function of their co-twin's phenotype) as shown in Saudino et al., (2000).  
404 Indeed, an ACE model with a contrast effect showed the best fit (Supporting Table 6).  
405 This model (without the contrast effect for simplicity of presentation) is shown in  
406 Figure 2B (estimates and contrast effects with 95% confidence intervals are presented  
407 in Supporting Table 9; the second best fitting model, the ADE model, is presented in  
408 Supporting Table 9B). The contrast effect at each age ranged between -.26 and -.32,

409 suggesting the presence of parental bias. After accounting for this bias, the main  
410 portion of the variance across childhood was accounted for by genetic influences. The  
411 remaining variance tended to divide relatively evenly between the shared and non-  
412 shared environment. The genetic influences at age 3 continued to contribute to the  
413 variance across childhood. Notably, the shared environment confidence intervals were  
414 very large, suggesting the need to investigate these effects in a sample with greater  
415 statistical power.

416 For the internalizing factor, the DE model fit the data best (Supporting Table 6).  
417 However, a model with a dominant genetic effect (i.e., interaction effects), without an  
418 additive effect (i.e., main effect), is considered unlikely (Evans, 2020), and we  
419 therefore show the second best fitting model in Figure 2C, which is the ADE model  
420 (estimates with 95% confidence intervals are presented in Supporting Table 10A, and  
421 the DE model is presented in Supporting Table 10B). The ADE model for the  
422 internalizing factor suggested that about half (.41-.60) of the individual differences in  
423 internalizing symptoms from early to middle childhood are affected by genetic  
424 influences (whether additive or dominant). Most of these genetic effects were already  
425 present at age 3 or 5, suggesting that a large proportion of the genetic influences on  
426 internalizing symptoms is stable from early to middle childhood. The rest of the  
427 variance was accounted for by non-shared environmental effects and measurement  
428 error.

429

#### 430 *The psychopathology factors as predictors*

431 The *p*-factor was the most consistent and reliable of the three psychopathology factors  
432 in predicting developmental problems at age 8-9 (odds ratios ranging between 1.42  
433 and 1.84; see Figure 3 and additional statistics in Supporting Table 11A).

434 Interestingly, the  $p$ -factor retained its value as a predictor, as early as age 3, even  
435 when developmental problems from the same age as the  $p$ -factor were included in the  
436 model (odds ratios ranging between 1.36 and 1.60; Figure 3 and Supporting Table  
437 11B).

438 The  $p$ -factor was also the best predictor of self-esteem at age 11 ( $R^2$  ranging  
439 from .015 to .04), indicating that, on average, children with higher  $p$ -factor scores  
440 reported lower self-esteem at age 11. Interestingly, the externalizing factor was the  
441 best predictor of life satisfaction at age 13 ( $R^2$  ranging from .007 to .014); children  
442 with higher externalizing symptoms tended to report poorer life satisfaction (Figure 3  
443 and Supporting Table 11C).

444

#### 445 *Predicting the psychopathology factors*

446 Exploratory analyses, examining possible early-life predictors of the psychopathology  
447 factors, are presented in Table 2 and Supporting Table 12, which includes additional  
448 information such as  $p$ -values corrected for multiple comparisons. Most predictors  
449 explained about 1% or less of the variance in the psychopathology factors. On average  
450 across waves, the summary score of neonatal problems, which consisted of neonatal  
451 hepatitis, neonatal diabetes, and having been in an incubator, explained the most  $p$ -  
452 factor variance at each age ( $R^2$  from .004 to .013), such that greater neonatal problems  
453 were associated with higher  $p$ -factor scores across childhood.

454 For the internalizing factor, family SES at age 3 appeared to be the strongest  
455 predictor, explaining the most variance on average across waves ( $R^2$  ranging from  
456 .005 to .017); children raised in families with higher SES tended to have fewer  
457 internalizing symptoms. For the externalizing factor, developmental problems at age 3  
458 explained the most variance on average across waves ( $R^2$  ranging from .006 to .01);

459 children with more developmental problems at age 3 tended to have more  
460 externalizing symptoms across childhood.

461

## 462 **Discussion**

463 In the current study, we investigated the *p*-factor and the more specific/residualized  
464 internalizing and externalizing factors from early to middle childhood. In general, we  
465 found that 1) the *p*-factor is present in children as young as 3 years old; 2) there is  
466 little to no effect of the shared-environment for *p* and the specific/residualized  
467 internalizing factor, and all factors show strong and relatively stable genetic  
468 influences; 3) early life measure, such as childhood SES and neonatal and pregnancy  
469 risk, while at times significantly associated with the *p*-factor, do not explain more than  
470 1% of the variance in any of the three psychopathology factors; and 4) the *p*-factor in  
471 early childhood can help to predict developmental problems and self-esteem in ages  
472 8-9 and 11, respectively.

473 Our analyses indicated that a bifactor model which includes a general  
474 psychopathology factor, i.e., the *p*-factor, and two specific/residualized factors  
475 (internalizing and externalizing), fit the data best across all four waves from early to  
476 middle childhood. This supports and replicates previous findings of a transdiagnostic  
477 factor in childhood (e.g., McElroy, Belsky, Carragher, Fearon, & Patalay, 2018;  
478 Morales et al., 2021). However, the use of fit indices for determining the model that  
479 best represents the structure of psychopathology has been criticized, as simulations  
480 have shown that the bifactor model is found as the best fitting model even when  
481 simulated data is created based on a correlated factors model (Greene et al., 2019).  
482 We were therefore interested in externally validating the *p*-factor, by examining its  
483 association with known correlates.

484           Indeed, as previous studies on different samples have indicated (Avinun et al.,  
485   2020; Caspi et al., 2014; Etkin et al., 2020), the  $p$ -factor is negatively associated with  
486   agreeableness and conscientiousness, and positively associated with neuroticism. It is  
487   noteworthy that in our study the  $p$ -factor was estimated based on mother reports,  
488   while personality traits were assessed by self-reports of the children, thus ruling out  
489   shared method (source) variance as accounting for this association. The externalizing  
490   factor (net of  $p$ ) was negatively associated with conscientiousness and positively  
491   associated with extraversion. In contrast, the internalizing factor (net of  $p$ ) was  
492   positively associated with neuroticism and negatively associated with extraversion.  
493   This association between the three psychopathology factors and profiles of Big Five  
494   traits has now been demonstrated across cohorts varying in age and culture, and  
495   further supports the notion of overlapping taxonomies between the basic structure of  
496   personality and psychopathology (Brandes, Herzhoff, Smack, & Tackett, 2019).

497           We found that the externalizing factor (net of  $p$ ) was most strongly associated  
498   with cognitive ability, a finding that is inconsistent with previous studies in which the  
499    $p$ -factor was more strongly associated with measures of executive functioning (Caspi  
500   & Moffitt, 2018; Martel et al., 2017). It is possible that the use of different  
501   measurements or the reliance on symptom-level (our study) rather than diagnosis-  
502   level measures for the factor analysis (symptom counts or diagnostic probabilistic  
503   bands; Caspi & Moffitt, 2018; Martel et al., 2017) account for this inconsistency.  
504   Alternatively, if psychopathology is causal to cognitive impairment, it may be that  
505   disruptions to cognitive ability have yet to emerge in our young sample. Lastly, the  
506   items with the highest loadings on the externalizing factor related to inattention (e.g.,  
507   easily distracted and cannot concentrate or finish tasks) which likely affected the  
508   children's performance during the cognitive ability tasks.

509           The predictive utility of the *p*-factor was demonstrated by its positive  
510 association with developmental problems at age 8-9 and negative association with  
511 self-esteem, as measured in age 11 and self-reported by the children. While the  
512 specific developmental pathways leading to the latter association remain to be  
513 elucidated, one possibility may relate to previous findings showing that neuroticism,  
514 depression, and self-esteem are affected by shared genetic influences (Neiss,  
515 Stevenson, Legrand, Iacono, & Sedikides, 2009), suggesting that they have a shared  
516 etiology. Alternatively, psychopathology may increase the risk of exposure to  
517 stressful experiences, such as being bullied (Arseneault, Bowes, & Shakoor, 2010),  
518 leading to poorer self-esteem. Future research aimed at identifying these pathways has  
519 implications for how to most effectively target interventions.

520           Our finding of model invariance, as suggested by fit statistics, together with  
521 moderate to high correlations between the *p*-factor across waves, and relatively  
522 consistent factor loadings, which showed little change during development from early  
523 to middle childhood, indicated that *p* is reliable and stable across childhood.  
524 Additional support for the reliability of the *p*-factor was obtained from our  
525 longitudinal genetic analysis, which indicated that the *p*-factor was substantially  
526 heritable and that the genetic effects on the *p*-factor at age 3 meaningfully contribute  
527 to the genetic influences on the *p*-factor in all ages. The only previous longitudinal  
528 genetic study of the *p*-factor included twins from age 7 to 16 and has also found that  
529 the *p*-factor is highly heritable and that genetic factors contribute to stability  
530 (Allegrini et al., 2020).

531           Our longitudinal genetic analyses showed that genetic effects accounted for a  
532 large portion of the variance in the internalizing (.41-.60) and externalizing (.51-.72)  
533 factors. For the internalizing factor, both additive and dominant genetic influences

534 (i.e., both main effects and interactions between genetic variants) were indicated, and  
535 there was no evidence for shared environment influences. The remaining variance was  
536 accounted for by the non-shared environment. For the externalizing factor a contrast  
537 effect was found, suggesting that parents tend to exaggerate the differences in  
538 externalizing symptoms between DZ twins. Thus, future studies should use  
539 observational methods or interviews to study the longitudinal genetic and  
540 environmental effects on the specific/residualized factors. Variance in the  
541 externalizing factor (net of  $p$ ) not accounted for by genetic influences was evenly  
542 divided between the shared and non-shared environment. Importantly, the broad  
543 confidence intervals of the models for both specific/residualized factors, suggested  
544 that a larger sample with more statistical power may be needed.

545       Although the  $p$ -factor appears to represent a real shared general risk for  
546 psychopathology, its origins remain unclear. Here, we examined whether measures  
547 that can be assessed in early life, such as early childhood SES and pregnancy or  
548 neonatal complications, can predict the  $p$ -factor in childhood. This was guided by  
549 previous research suggesting that early childhood SES and fetal and early life  
550 programming may be linked to mental health (Lewis, Galbally, Gannon, &  
551 Symeonides, 2014; O'Donnell & Meaney, 2017; Peverill et al., 2020). All measures  
552 showed only weak associations, if at all, with the  $p$ -factor, explaining 1%, and usually  
553 less, of the factor variance. This was also true for the specific/residualized  
554 externalizing and internalizing factors. Similarly, developmental problems at age 3  
555 did not explain more than 1% of the variance in the psychopathology factors. Taken  
556 together, these suggest that a cumulative risk factor score composed of many fetal and  
557 early life stressors may be a better approach for the prediction of the latent factors of  
558 psychopathology (Meehan et al., 2020).



559

560 *Strengths and Limitations*

561 To our knowledge, the current study is the first to provide an in-depth developmental  
562 and longitudinal genetic investigation of the specific/residualized externalizing and  
563 internalizing factors from the bifactor model and the first to examine the links  
564 between the general and specific/residualized factors of psychopathology and  
565 pregnancy, obstetric, and neonatal measures. However, this study also has several  
566 limitations. First, the assessment of psychopathology was restricted to maternal  
567 reports and relied on a relatively limited number of items. While this is not  
568 exceptional (e.g., McElroy et al., 2018; Patalay et al., 2015), further research is  
569 needed to understand how these and the inclusion of only identical items across ages,  
570 affected the findings. Second, our sample consisted only of twins and therefore the  
571 generalizability of the associations between the psychopathology factors and other  
572 measures need to be replicated. Notably however, in the context of the associations  
573 with the pregnancy, obstetric, and neonatal measures, the reliance on twins was  
574 advantageous, as twin pregnancies are associated with higher complications compared  
575 to singletons (Obiechina, Okolie, Eleje, Okechukwu, & Anemeje, 2011), allowing for  
576 greater variance. Third, our study was restricted to the developmental period of early  
577 to mid-childhood; research encompassing longer developmental periods is needed.

578

579 *Conclusions*

580 Our study supports accumulating research indicating a general factor of  
581 psychopathology, which represents transdiagnostic risk across mental disorders (Caspi  
582 & Moffitt, 2018), and shows that this general factor is highly heritable, discernible in  
583 early childhood, and stable from early to mid-childhood. Results also suggest that the

584 *p*-factor is not meaningfully predicted by pregnancy, obstetric, and neonatal events.  
585 Lastly, to our knowledge, this is the first in-depth genetically informed investigation  
586 of the specific/residualized factors of psychopathology in childhood. Findings  
587 indicated moderate to large genetic influences on both specific/residualized factors  
588 with a meaningful portion of these influences already present at age 3.

589

590

591

### Acknowledgements

592 We thank the participating families for their cooperation and all the lab members of  
593 the Social Development lab throughout the years for data collection and coding. We  
594 would also like to thank Prof. Kimberly Saudino for her help with the contrast effect  
595 analyses. The Longitudinal Israeli Study of Twins (LIST) was founded by grant No.  
596 31/06 from the Israel Science Foundation. The work was further supported by grant  
597 No. 1670/13 from the Israel Science Foundation, starting grant No. 240994 from the  
598 European Research Council, and by a grant from The Science of Generosity Initiative,  
599 funded by the John Templeton Foundation to Ariel Knafo-Noam. RA is supported by  
600 a Lady Davis fellowship. The authors declare they have no conflicts of interest.

601

602

603

### Correspondence

604 Correspondence concerning this article should be addressed to Reut Avinun, PhD,  
605 Department of Psychology, The Hebrew University of Jerusalem, Mount Scopus,  
606 Jerusalem, 91905 Israel. E-mail: reut.avinun@mail.huji.ac.il

607 **References**

- 608 Allegrini, A. G., Cheesman, R., Rimfeld, K., Selzam, S., Pingault, J. B., Eley, T. C.,  
609 & Plomin, R. (2020). The p factor: genetic analyses support a general  
610 dimension of psychopathology in childhood and adolescence. *Journal of Child*  
611 *Psychology and Psychiatry*, *61*(1), 30-39.
- 612 Arseneault, L., Bowes, L., & Shakoor, S. (2010). Bullying victimization in youths and  
613 mental health problems:'much ado about nothing'? *Psychological Medicine*,  
614 *40*(5), 717.
- 615 Avinun, R., & Knafo-Noam, A. (2017). Parental brain-derived neurotrophic factor  
616 genotype, child prosociality, and their interaction as predictors of parents'  
617 warmth. *Brain and Behavior*, *7*(5).
- 618 Avinun, R., & Knafo, A. (2013). The Longitudinal Israeli Study of Twins (LIST)—  
619 An Integrative View of Social Development. *Twin Research and Human*  
620 *Genetics*, *16*(1), 197-201. doi: 10.1017/thg.2012.73
- 621 Avinun, R., Romer, A. L., & Israel, S. (2020). Vitamin D polygenic score is  
622 associated with neuroticism and the general psychopathology factor. *Progress*  
623 *in Neuro-Psychopharmacology and Biological Psychiatry*, 109912.
- 624 Bates, T., Neale, M., & Maes, H. (2016). umx: A library for Structural Equation and  
625 Twin Modelling in R. *Journal of statistical software*.
- 626 Blanco, C., Wall, M. M., Hoertel, N., Krueger, R. F., Liu, S.-M., Grant, B. F., &  
627 Olsson, M. (2019). Psychiatric disorders and risk for multiple adverse  
628 outcomes: a national prospective study. *Molecular Psychiatry*, 1-10.
- 629 Brandes, C. M., Herzhoff, K., Smack, A. J., & Tackett, J. L. (2019). The p factor and  
630 the n factor: Associations between the general factors of psychopathology and  
631 neuroticism in children. *Clinical Psychological Science*, *7*(6), 1266-1284.
- 632 Buss, A. H., & Plomin, R. (1984). *Temperament: early developing personality traits*.  
633 Hillsdale, NJ: Lawrence Erlbaum Associates, Inc.
- 634 Caspi, A., Houts, R. M., Belsky, D. W., Goldman-Mellor, S. J., Harrington, H., Israel,  
635 S., . . . Moffitt, T. E. (2014). The p factor: one general psychopathology factor  
636 in the structure of psychiatric disorders? *Clinical Psychological Science*, *2*(2),  
637 119-137.
- 638 Caspi, A., & Moffitt, T. E. (2018). All for one and one for all: Mental disorders in one  
639 dimension. *American Journal of Psychiatry*, *175*(9), 831-844.

- 640 Chiorean, A., Savoy, C., Beattie, K., el Helou, S., Silmi, M., & Van Lieshout, R. J.  
641 (2020). Childhood and adolescent mental health of NICU graduates: an  
642 observational study. *Archives of Disease in Childhood*, *105*, 684-689. doi:  
643 10.1136/archdischild-2019-318284
- 644 De Mola, C. L., De França, G. V. A., de Avila Quevedo, L., & Horta, B. L. (2014).  
645 Low birth weight, preterm birth and small for gestational age association with  
646 adult depression: systematic review and meta-analysis. *The British Journal of*  
647 *Psychiatry*, *205*(5), 340-347.
- 648 Ehrenstein, V., Pedersen, L., Grijota, M., Nielsen, G. L., Rothman, K. J., & Sørensen,  
649 H. T. (2009). Association of Apgar score at five minutes with long-term  
650 neurologic disability and cognitive function in a prevalence study of Danish  
651 conscripts. *BMC pregnancy and childbirth*, *9*(1), 1-7.
- 652 Etkin, P., Mezquita, L., López-Fernández, F. J., Ortet, G., & Ibáñez, M. I. (2020).  
653 Five Factor model of personality and structure of psychopathological  
654 symptoms in adolescents. *Personality and Individual Differences*, *163*,  
655 110063.
- 656 Evans, D. M. (2020). The Boulder Workshop Question Box. *Behavior Genetics*, 1-10.
- 657 Githens, P. B., Glass, C. A., Sloan, F. A., & Entman, S. S. (1993). Maternal recall and  
658 medical records: an examination of events during pregnancy, childbirth, and  
659 early infancy. *Birth*, *20*(3), 136-141.
- 660 Goldsmith, H. (1991). A zygosity questionnaire for young twins: A research note.  
661 *Behavior Genetics*, *21*(3), 257-269.
- 662 Gomez, R., Stavropoulos, V., Vance, A., & Griffiths, M. D. (2019). Re-evaluation of  
663 the latent structure of common childhood disorders: Is there a general  
664 psychopathology factor (p-factor)? *International Journal of Mental Health*  
665 *and Addiction*, *17*(2), 258-278.
- 666 Goodman, R. (1997). The Strengths and Difficulties Questionnaire: a research note.  
667 *Journal of child psychology and psychiatry, and allied disciplines*, *38*(5), 581.
- 668 Goodman, R., & Stevenson, J. (1989). A twin study of hyperactivity—II. The  
669 aetiological role of genes, family relationships and perinatal adversity. *Journal*  
670 *of Child Psychology and Psychiatry*, *30*(5), 691-709.
- 671 Greene, A. L., Eaton, N. R., Li, K., Forbes, M. K., Krueger, R. F., Markon, K. E., . . .  
672 Docherty, A. R. (2019). Are fit indices used to test psychopathology structure  
673 biased? A simulation study. *Journal of Abnormal Psychology*, *128*(7), 740.

- 674 Halekoh, U., Højsgaard, S., & Yan, J. (2006). The R package geepack for generalized  
675 estimating equations. *Journal of statistical software*, *15*(2), 1-11.
- 676 Hamlyn, J., Duhig, M., McGrath, J., & Scott, J. (2013). Modifiable risk factors for  
677 schizophrenia and autism—shared risk factors impacting on brain  
678 development. *Neurobiology of Disease*, *53*, 3-9.
- 679 Hankin, B. L., Davis, E. P., Snyder, H., Young, J. F., Glynn, L. M., & Sandman, C. A.  
680 (2017). Temperament factors and dimensional, latent bifactor models of child  
681 psychopathology: Transdiagnostic and specific associations in two youth  
682 samples. *Psychiatry Research*, *252*, 139-146.
- 683 Hu, L. t., & Bentler, P. M. (1999). Cutoff criteria for fit indexes in covariance  
684 structure analysis: Conventional criteria versus new alternatives. *Structural  
685 equation modeling: a multidisciplinary journal*, *6*(1), 1-55.
- 686 Huebner, E. S. (1991). Initial development of the student's life satisfaction scale.  
687 *School Psychology International*, *12*(3), 231-240.
- 688 Hughes, C., & Ensor, R. (2011). Individual differences in growth in executive  
689 function across the transition to school predict externalizing and internalizing  
690 behaviors and self-perceived academic success at 6 years of age. *Journal of  
691 Experimental Child Psychology*, *108*(3), 663-676.
- 692 Hyland, P., Murphy, J., Shevlin, M., Carey, S., Vallières, F., Murphy, D., & Elklit, A.  
693 (2018). Correlates of a general psychopathology factor in a clinical sample of  
694 childhood sexual abuse survivors. *Journal of Affective Disorders*, *232*, 109-  
695 115.
- 696 John, O. P., Donahue, E., & Kentle, R. (1991). *The big five inventory: Versions 4a  
697 and 54 (Technical report)*. Berkeley: University of California, Institute of  
698 Personality and Social Research.
- 699 Laceulle, O. M., Chung, J. M., Vollebergh, W. A., & Ormel, J. (2020). The  
700 wide-ranging life outcome correlates of a general psychopathology factor in  
701 adolescent psychopathology. *Personality and mental health*, *14*(1), 9-29.
- 702 Lahey, B. B., Applegate, B., Hakes, J. K., Zald, D. H., Hariri, A. R., & Rathouz, P. J.  
703 (2012). Is there a general factor of prevalent psychopathology during  
704 adulthood? *Journal of Abnormal Psychology*, *121*(4), 971.
- 705 Lahey, B. B., Rathouz, P. J., Keenan, K., Stepp, S. D., Loeber, R., & Hipwell, A. E.  
706 (2015). Criterion validity of the general factor of psychopathology in a

- 707 prospective study of girls. *Journal of Child Psychology and Psychiatry*, 56(4),  
708 415-422.
- 709 Lerner, M. J., & Miller, D. T. (1978). Just world research and the attribution process:  
710 looking back and ahead. *Psychological bulletin*, 85(5), 1030.
- 711 Lewis, A. J., Galbally, M., Gannon, T., & Symeonides, C. (2014). Early life  
712 programming as a target for prevention of child and adolescent mental  
713 disorders. *BMC Medicine*, 12(1), 1-15.
- 714 Liu, J., Raine, A., Wuerker, A., Venables, P. H., & Mednick, S. (2009). The  
715 association of birth complications and externalizing behavior in early  
716 adolescents: direct and mediating effects. *Journal of Research on Adolescence*,  
717 19(1), 93-111.
- 718 Martel, M. M., Pan, P. M., Hoffmann, M. S., Gadelha, A., do Rosário, M. C., Mari, J.  
719 J., . . . Bressan, R. A. (2017). A general psychopathology factor (P factor) in  
720 children: structural model analysis and external validation through familial  
721 risk and child global executive function. *Journal of Abnormal Psychology*,  
722 126(1), 137.
- 723 McElroy, E., Belsky, J., Carragher, N., Fearon, P., & Patalay, P. (2018).  
724 Developmental stability of general and specific factors of psychopathology  
725 from early childhood to adolescence: dynamic mutualism or p-differentiation?  
726 *Journal of Child Psychology and Psychiatry*, 59(6), 667-675.
- 727 Meehan, A. J., Latham, R. M., Arseneault, L., Stahl, D., Fisher, H. L., & Danese, A.  
728 (2020). Developing an individualized risk calculator for psychopathology  
729 among young people victimized during childhood: A population-  
730 representative cohort study. *Journal of Affective Disorders*, 262, 90-98.
- 731 Merikangas, K. R., He, J.-p., Burstein, M., Swanson, S. A., Avenevoli, S., Cui, L., . . .  
732 Swendsen, J. (2010). Lifetime prevalence of mental disorders in US  
733 adolescents: results from the National Comorbidity Survey Replication–  
734 Adolescent Supplement (NCS-A). *Journal of the American Academy of Child  
735 and Adolescent Psychiatry*, 49(10), 980-989.
- 736 Morales, S., Tang, A., Bowers, M. E., Miller, N. V., Buzzell, G. A., Smith, E., . . .  
737 Fox, N. A. (2021). Infant temperament prospectively predicts general  
738 psychopathology in childhood. *Development and Psychopathology*, 1-10. doi:  
739 10.1017/s0954579420001996

- 740 Murray, A. L., Eisner, M., & Ribeaud, D. (2016). The development of the general  
741 factor of psychopathology ‘p factor’ through childhood and adolescence.  
742 *Journal of Abnormal Child Psychology*, *44*(8), 1573-1586.
- 743 Muthén, L. K., & Muthén, B. O. (2007). Mplus User’s Guide. *Los Angeles, CA:*  
744 *Muthén & Muthén.*
- 745 Neale, M., Boker, S., Xie, G., & Maes, H. (2003). *Mx: Statistical Modeling.*  
746 Richmond, VA: Department of Psychiatry, Virginia Institute for Psychiatric  
747 and Behavior Genetics, Virginia Commonwealth University.
- 748 Neale, M. C., Hunter, M. D., Pritikin, J. N., Zahery, M., Brick, T. R., Kirkpatrick, R.  
749 M., . . . Boker, S. M. (2016). OpenMx 2.0: Extended structural equation and  
750 statistical modeling. *Psychometrika*, *81*(2), 535-549.
- 751 Neiss, M. B., Stevenson, J., Legrand, L. N., Iacono, W. G., & Sedikides, C. (2009).  
752 Self-esteem, negative emotionality, and depression as a common  
753 temperamental core: A study of mid-adolescent twin girls. *Journal of*  
754 *Personality*, *77*(2), 327-346.
- 755 Newman, D. L., Moffitt, T. E., Caspi, A., & Silva, P. A. (1998). Comorbid mental  
756 disorders: implications for treatment and sample selection. *Journal of*  
757 *Abnormal Psychology*, *107*(2), 305.
- 758 Nosarti, C., Reichenberg, A., Murray, R. M., Cnattingius, S., Lambe, M. P., Yin, L., .  
759 . . Hultman, C. M. (2012). Preterm birth and psychiatric disorders in young  
760 adult life. *Archives of General Psychiatry*, *69*(6), 610-617.
- 761 O’Donnell, K. J., & Meaney, M. J. (2017). Fetal origins of mental health: the  
762 developmental origins of health and disease hypothesis. *American Journal of*  
763 *Psychiatry*, *174*(4), 319-328.
- 764 Obiechina, N., Okolie, V., Eleje, G., Okechukwu, Z., & Anemeje, O. (2011). Twin  
765 versus singleton pregnancies: the incidence, pregnancy complications, and  
766 obstetric outcomes in a Nigerian tertiary hospital. *International journal of*  
767 *women's health*, *3*, 227.
- 768 Olino, T. M., Dougherty, L. R., Bufferd, S. J., Carlson, G. A., & Klein, D. N. (2014).  
769 Testing models of psychopathology in preschool-aged children using a  
770 structured interview-based assessment. *Journal of Abnormal Child*  
771 *Psychology*, *42*(7), 1201-1211.

- 772 Patalay, P., Fonagy, P., Deighton, J., Belsky, J., Vostanis, P., & Wolpert, M. (2015).  
773 A general psychopathology factor in early adolescence. *The British Journal of*  
774 *Psychiatry*, 207(1), 15-22.
- 775 Pettersson, E., Lahey, B. B., Larsson, H., & Lichtenstein, P. (2018). Criterion Validity  
776 and Utility of the General Factor of Psychopathology in Childhood: Predictive  
777 Associations With Independently Measured Severe Adverse Mental Health  
778 Outcomes in Adolescence. *Journal of the American Academy of Child and*  
779 *Adolescent Psychiatry*, 57(6), 372-383.
- 780 Peverill, M., Dirks, M. A., Narvaja, T., Herts, K. L., Comer, J. S., & McLaughlin, K.  
781 A. (2020). Socioeconomic status and child psychopathology in the United  
782 States: A meta-analysis of population-based studies. *Clinical Psychology*  
783 *Review*, 101933.
- 784 Plomin, R., Kagan, J., Emde, R. N., Reznick, J. S., Braungart, J. M., Robinson, J., . . .  
785 Fulker, D. W. (1993). Genetic change and continuity from fourteen to twenty  
786 months: The MacArthur Longitudinal Twin Study. *Child Development*, 64(5),  
787 1354-1376.
- 788 R Core Team. (2020). R: A language and environment for statistical computing.  
789 Vienna, Austria: R foundation for Statistical Computing. Retrieved from  
790 <http://www.R-project.org/>
- 791 Riglin, L., Thapar, A. K., Leppert, B., Martin, J., Richards, A., Anney, R., . . . Lahey,  
792 B. B. (2019). Using genetics to examine a general liability to childhood  
793 psychopathology. *Behavior Genetics*, 1-8.
- 794 Romer, A. L., Knodt, A. R., Houts, R., Brigidi, B. D., Moffitt, T. E., Caspi, A., &  
795 Hariri, A. R. (2018). Structural alterations within cerebellar circuitry are  
796 associated with general liability for common mental disorders. *Molecular*  
797 *Psychiatry*, 23(4), 1084.
- 798 Rosenberg, M. (1965). *Society and the adolescent self-image*. Princeton, NJ:  
799 Princeton University Press.
- 800 Saudino, K. J., Cherny, S. S., & Plomin, R. (2000). Parent ratings of temperament in  
801 twins: explaining the 'too low' DZ correlations. *Twin Research and Human*  
802 *Genetics*, 3(4), 224-233.
- 803 Selzam, S., Coleman, J. R., Caspi, A., Moffitt, T. E., & Plomin, R. (2018). A  
804 polygenic p factor for major psychiatric disorders. *Translational Psychiatry*,  
805 8(1), 205.



- 806 Snyder, H. R., Young, J. F., & Hankin, B. L. (2017). Strong homotypic continuity in  
807 common psychopathology-, internalizing-, and externalizing-specific factors  
808 over time in adolescents. *Clinical Psychological Science*, 5(1), 98-110.
- 809 Thapar, A., Holmes, J., Poulton, K., & Harrington, R. (1999). Genetic basis of  
810 attention deficit and hyperactivity. *The British Journal of Psychiatry*, 174(2),  
811 105-111.
- 812 Van Lieshout, R. J., & Voruganti, L. P. (2008). Diabetes mellitus during pregnancy  
813 and increased risk of schizophrenia in offspring: a review of the evidence and  
814 putative mechanisms. *Journal of psychiatry & neuroscience: JPN*, 33(5), 395.
- 815 Vertsberger, D., Abramson, L., & Knafo-Noam, A. (2019). The Longitudinal Israeli  
816 Study of Twins (LIST) Reaches Adolescence: Genetic and Environmental  
817 Pathways to Social, Personality and Moral Development. *Twin Research and*  
818 *Human Genetics*, 22(6), 567-571.

819

820

821 **Table 1.** Associations between the three psychopathology factors, personality traits, cognitive ability, and sex from early to middle childhood. Standardized  
 822 estimates and standard errors from generalized estimating equation models are presented.

|                          | p factor            |                     |                     |                     | Internalizing factor |              |                   |                     |
|--------------------------|---------------------|---------------------|---------------------|---------------------|----------------------|--------------|-------------------|---------------------|
|                          | Age 3               | Age 5               | Age 6.5             | Age 8-9             | Age 3                | Age 5        | Age 6.5           | Age 8-9             |
| <b>Sex<sup>^</sup></b>   | <b>-0.11 (0.02)</b> | <b>-0.13 (0.03)</b> | <b>-0.11 (0.04)</b> | <b>-0.15 (0.04)</b> | 0.04 (0.02)          | 0.03 (0.03)  | <b>0.1 (0.04)</b> | 0.05 (0.04)         |
| <b>Cognitive ability</b> | -0.07 (0.03)        | -0.06 (0.04)        | -0.06 (0.04)        | -0.03 (0.04)        | 0.03 (0.03)          | -0.04 (0.04) | -0.03 (0.04)      | -0.02 (0.05)        |
| <b>Extraversion</b>      | 0.04 (0.04)         | <b>0.09 (0.04)</b>  | 0.09 (0.05)         | <b>0.12 (0.04)</b>  | -0.05 (0.03)         | -0.08 (0.04) | -0.1 (0.05)       | <b>-0.13 (0.05)</b> |
| <b>Agreeableness</b>     | -0.04 (0.04)        | <b>-0.09 (0.04)</b> | <b>-0.17 (0.05)</b> | <b>-0.17 (0.05)</b> | -0.03 (0.03)         | 0.04 (0.04)  | -0.01 (0.04)      | 0.02 (0.05)         |
| <b>Conscientiousness</b> | 0.01 (0.03)         | -0.02 (0.04)        | -0.09 (0.05)        | -0.09 (0.04)        | -0.01 (0.03)         | 0.03 (0.04)  | 0.02 (0.04)       | 0.02 (0.04)         |
| <b>Neuroticism</b>       | 0.05 (0.04)         | <b>0.1 (0.04)</b>   | 0.1 (0.05)          | 0.1 (0.05)          | 0.07 (0.03)          | 0.09 (0.04)  | 0.08 (0.05)       | <b>0.13 (0.05)</b>  |
| <b>Openness</b>          | 0.03 (0.03)         | 0.07 (0.04)         | -0.02 (0.05)        | 0.02 (0.05)         | -0.05 (0.03)         | -0.04 (0.04) | -0.03 (0.05)      | 0.06 (0.05)         |

823

824 **Table 1.** Continued.

|                          | Externalizing factor |                     |                     |                     |
|--------------------------|----------------------|---------------------|---------------------|---------------------|
|                          | Age 3                | Age 5               | Age 6.5             | Age 8-9             |
| <b>Sex<sup>^</sup></b>   | <b>-0.13 (0.02)</b>  | <b>-0.12 (0.03)</b> | <b>-0.11 (0.04)</b> | <b>-0.09 (0.04)</b> |
| <b>Cognitive ability</b> | -0.08 (0.03)         | <b>-0.15 (0.04)</b> | <b>-0.17 (0.04)</b> | <b>-0.24 (0.05)</b> |
| <b>Extraversion</b>      | <b>0.09 (0.03)</b>   | 0.03 (0.04)         | 0.09 (0.05)         | 0.04 (0.05)         |
| <b>Agreeableness</b>     | -0.06 (0.03)         | -0.03 (0.04)        | -0.04 (0.04)        | -0.03 (0.04)        |
| <b>Conscientiousness</b> | -0.04 (0.03)         | -0.06 (0.04)        | <b>-0.14 (0.05)</b> | <b>-0.16 (0.04)</b> |
| <b>Neuroticism</b>       | 0.02 (0.03)          | 0.01 (0.04)         | 0.01 (0.04)         | 0.03 (0.04)         |
| <b>Openness</b>          | 0.02 (0.03)          | 0.05 (0.04)         | -0.05 (0.04)        | -0.02 (0.04)        |

825 *Note.* Cognitive ability, as assessed at age 6.5, and personality traits as assessed at age 11 as outcomes in separate generalized estimating equations models for each of the  
 826 factors and waves. <sup>^</sup>In the models testing the association with sex (coded as 1=males, 2=female), the factors were the outcomes. Standardized estimates and standard  
 827 errors are presented. GEE results with  $p < .01$  are presented in bold font.

828 **Table 2.** Possible predictors of the psychopathology factors from early to middle childhood.

|                                    | p factor            |                     |              |                    | Internalizing factor |                     |                     |                     |
|------------------------------------|---------------------|---------------------|--------------|--------------------|----------------------|---------------------|---------------------|---------------------|
|                                    | Age 3               | Age 5               | Age 6.5      | Age 8-9            | Age 3                | Age 5               | Age 6.5             | Age 8-9             |
| Age 3 developmental problems       | <b>0.08 (0.03)</b>  | 0.06 (0.03)         | 0.07 (0.04)  | 0.07 (0.04)        | <b>0.09 (0.02)</b>   | <b>0.08 (0.03)</b>  | 0.07 (0.04)         | <b>0.1 (0.04)</b>   |
| Hospitalization before age 3       | 0.04 (0.03)         | 0.07 (0.03)         | 0.04 (0.04)  | 0.05 (0.04)        | -0.03 (0.03)         | 0.03 (0.03)         | 0.08 (0.04)         | 0.01 (0.04)         |
| Apgar 1 minute after birth         | 0.04 (0.03)         | -0.05 (0.05)        | 0.02 (0.06)  | 0.02 (0.05)        | 0.08 (0.04)          | 0.02 (0.05)         | -0.06 (0.07)        | -0.05 (0.06)        |
| Apgar 5 minute after birth         | 0.02 (0.03)         | -0.03 (0.04)        | -0.07 (0.05) | 0.03 (0.05)        | 0.03 (0.04)          | -0.03 (0.05)        | -0.09 (0.06)        | -0.03 (0.05)        |
| Birth weight                       | -0.06 (0.03)        | <b>-0.08 (0.03)</b> | -0.05 (0.04) | -0.03 (0.04)       | 0.01 (0.03)          | <b>-0.09 (0.03)</b> | -0.1 (0.05)         | -0.06 (0.05)        |
| Breast feeding                     | -0.05 (0.03)        | 0.01 (0.03)         | 0.05 (0.05)  | -0.09 (0.05)       | -0.01 (0.03)         | -0.04 (0.03)        | 0.01 (0.05)         | 0.04 (0.05)         |
| Complications of pregnancy         | <b>0.08 (0.03)</b>  | <b>0.08 (0.03)</b>  | 0.05 (0.05)  | 0.05 (0.04)        | 0.03 (0.03)          | 0.08 (0.03)         | 0.09 (0.04)         | <b>0.11 (0.04)</b>  |
| Hospitalization first year of life | 0.03 (0.03)         | 0.06 (0.03)         | 0.07 (0.04)  | <b>0.11 (0.04)</b> | -0.04 (0.03)         | 0.06 (0.04)         | 0.08 (0.04)         | 0.07 (0.04)         |
| Mother's Age at birth              | -0.02 (0.03)        | 0.01 (0.04)         | -0.02 (0.05) | 0.05 (0.05)        | -0.03 (0.03)         | -0.04 (0.03)        | -0.09 (0.04)        | -0.03 (0.04)        |
| Neonatal problems                  | 0.06 (0.03)         | <b>0.11 (0.03)</b>  | 0.08 (0.04)  | 0.09 (0.04)        | 0.01 (0.03)          | <b>0.07 (0.03)</b>  | 0.08 (0.04)         | 0.04 (0.04)         |
| SES at age 3                       | <b>-0.07 (0.03)</b> | <b>-0.11 (0.03)</b> | -0.09 (0.04) | 0.01 (0.05)        | <b>-0.1 (0.03)</b>   | <b>-0.14 (0.03)</b> | -0.07 (0.04)        | <b>-0.11 (0.04)</b> |
| Weeks of pregnancy                 | -0.04 (0.03)        | -0.05 (0.03)        | 0.01 (0.05)  | 0.02 (0.04)        | -0.03 (0.03)         | <b>-0.09 (0.03)</b> | <b>-0.11 (0.04)</b> | -0.05 (0.05)        |

829

830

831 **Table 2.** Continued.

|                                    | Externalizing factor |                     |                    |                    |
|------------------------------------|----------------------|---------------------|--------------------|--------------------|
|                                    | Age 3                | Age 5               | Age 6.5            | Age 8-9            |
| Age 3 developmental problems       | <b>0.1 (0.03)</b>    | <b>0.09 (0.03)</b>  | <b>0.11 (0.04)</b> | <b>0.11 (0.04)</b> |
| Hospitalization before age 3       | <b>0.06 (0.03)</b>   | <b>0.08 (0.03)</b>  | <b>0.12 (0.04)</b> | <b>0.1 (0.04)</b>  |
| Apgar 1 minute after birth         | -0.03 (0.04)         | -0.06 (0.05)        | -0.06 (0.06)       | 0.05 (0.05)        |
| Apgar 5 minute after birth         | 0.06 (0.03)          | 0.01 (0.05)         | 0.01 (0.05)        | 0.1 (0.04)         |
| Birth weight                       | <b>-0.09 (0.03)</b>  | -0.08 (0.03)        | -0.1 (0.04)        | -0.08 (0.05)       |
| Breast feeding                     | -0.03 (0.03)         | 0.02 (0.03)         | 0.03 (0.05)        | 0.01 (0.04)        |
| Complications of pregnancy         | <b>0.06 (0.02)</b>   | 0.05 (0.03)         | -0.05 (0.04)       | -0.03 (0.04)       |
| Hospitalization first year of life | 0.03 (0.03)          | 0.04 (0.03)         | 0.07 (0.04)        | <b>0.11 (0.04)</b> |
| Mother's Age at birth              | <b>-0.06 (0.03)</b>  | <b>-0.08 (0.03)</b> | -0.03 (0.05)       | 0.01 (0.04)        |
| Neonatal problems                  | <b>0.07 (0.03)</b>   | 0.02 (0.03)         | 0.09 (0.04)        | 0.06 (0.04)        |
| SES at age 3                       | 0.02 (0.02)          | -0.04 (0.03)        | -0.03 (0.04)       | 0.01 (0.04)        |
| Weeks of pregnancy                 | -0.05 (0.03)         | -0.05 (0.03)        | -0.09 (0.04)       | -0.05 (0.05)       |

832 *Note.* The factors as outcomes in separate generalized estimating equation models for each of the predictors and waves. Sex (coded as 1=males, 2=female), age, and SES  
833 from age 3 were used as covariates in all analyses (in the SES as variable of interest models sex and age were entered as covariates). Coefficients significant at  $p < .01$  are in  
834 bold font.

835

836 **Figure 1.** Psychopathology factors correlations.

837 **1A.** Correlations between the *p*, internalizing (INT), and  
 838 externalizing (EXT) factors from early- to mid- childhood (for one twin  
 839 per family).

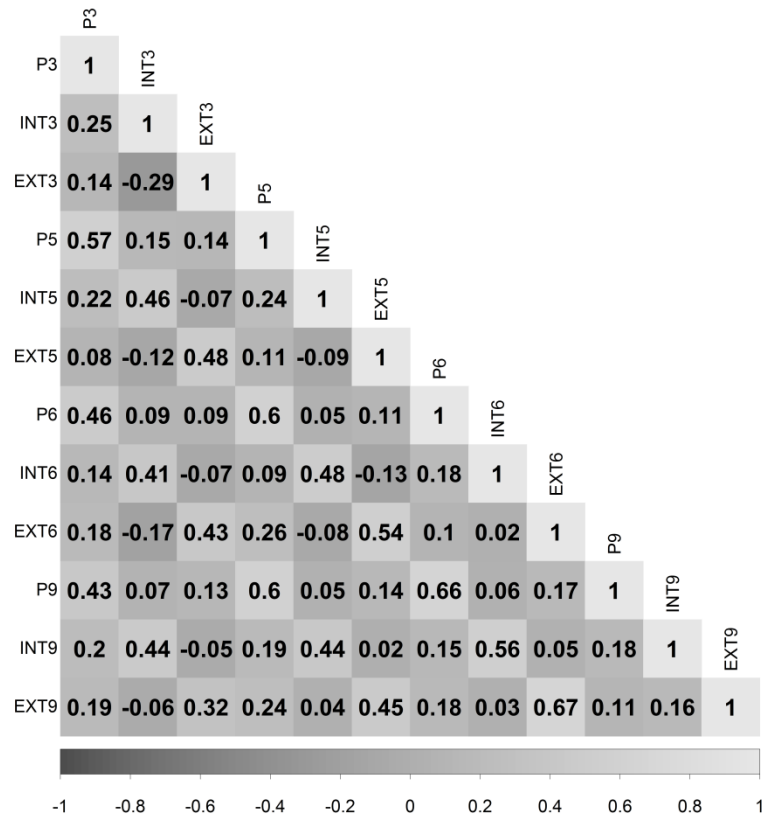

**1B.** Twin correlations and 95% confidence intervals for psychopathology factors from early- to mid- childhood.

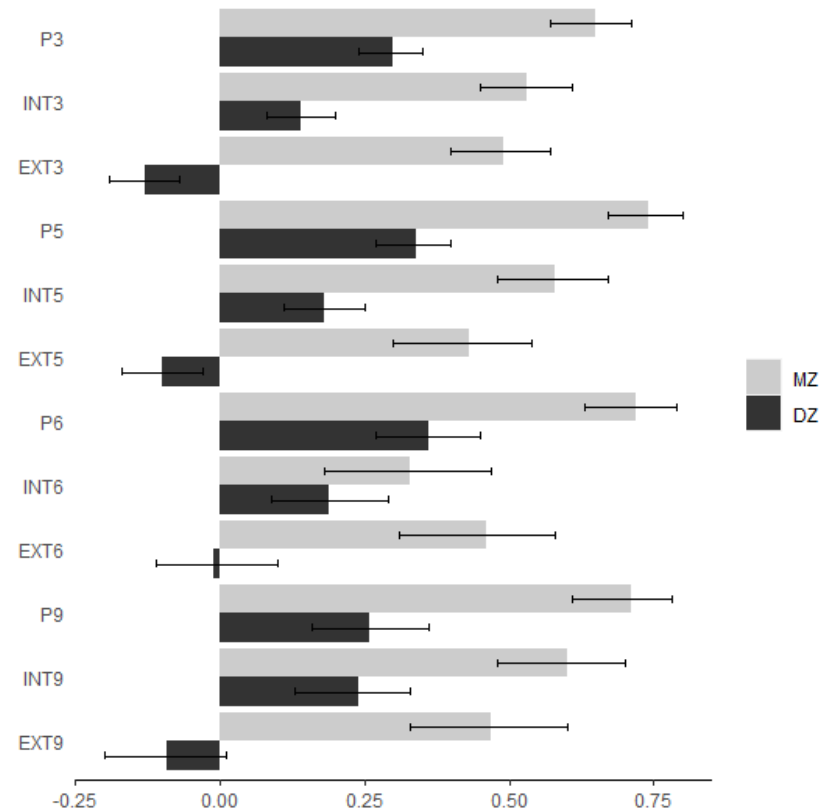

840

841

842 **Figure 2.** A longitudinal twin model. Genetic and environmental influences on psychopathology factors, from early to middle childhood.

843 A. The p factor, AE model.

844

845

846

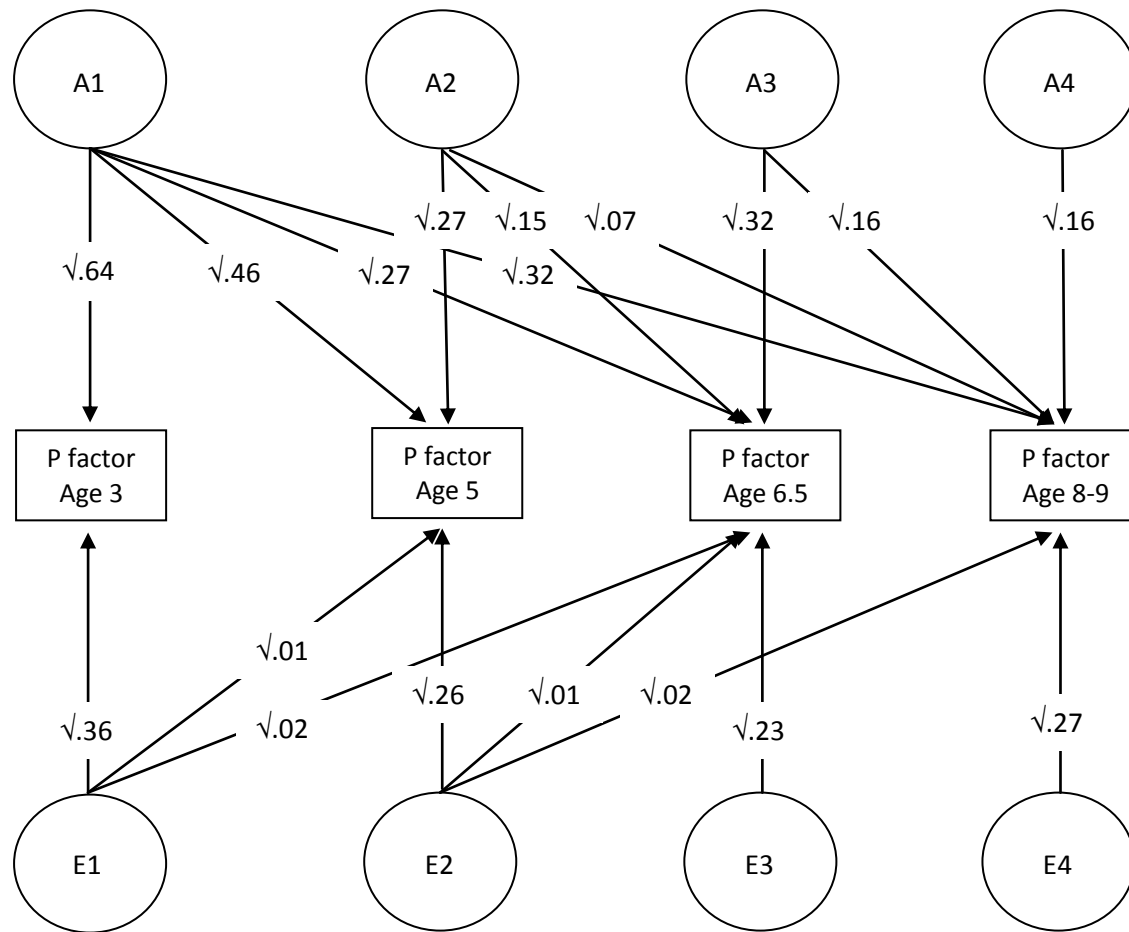

847 B. The specific/residualized externalizing factor, ACE model with contrast effect (not shown).

848

849

850

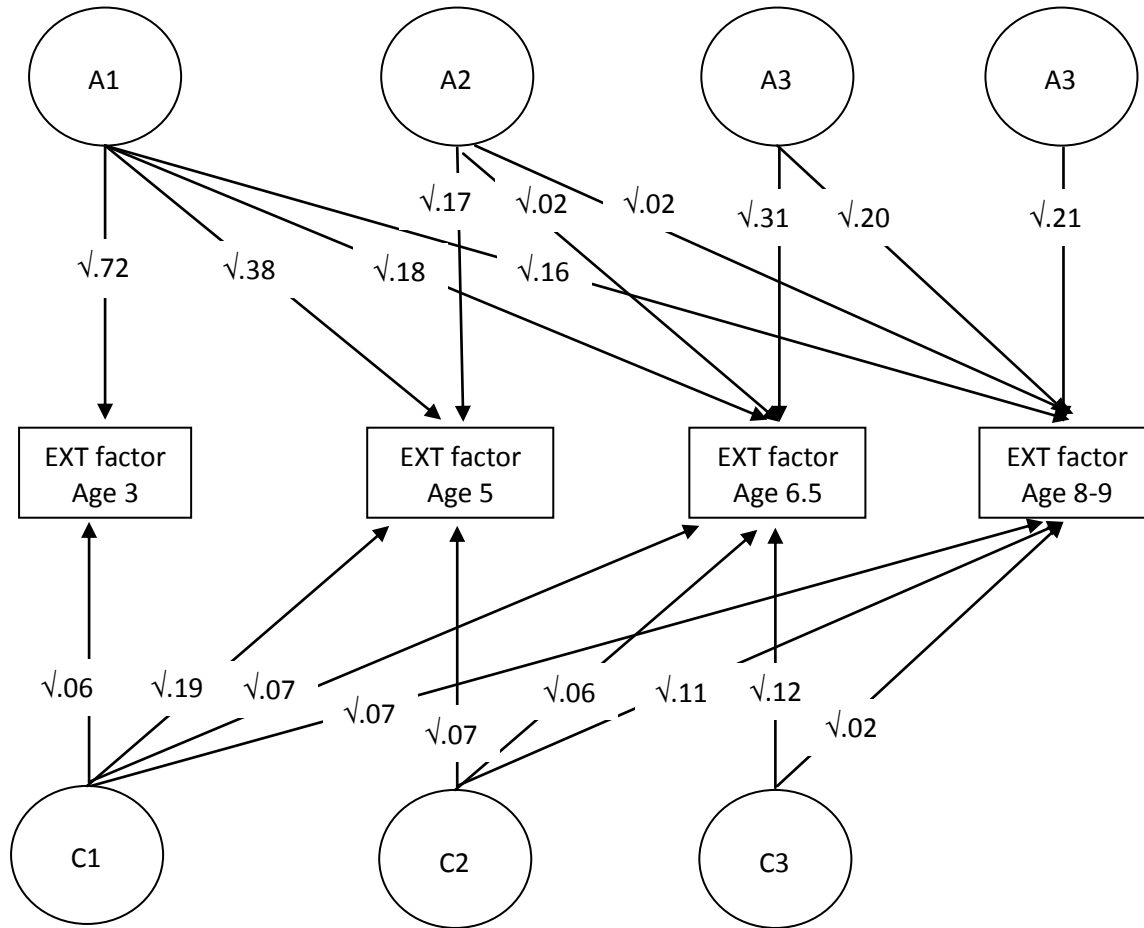

851 B. continued. The externalizing factor.

852

853

854

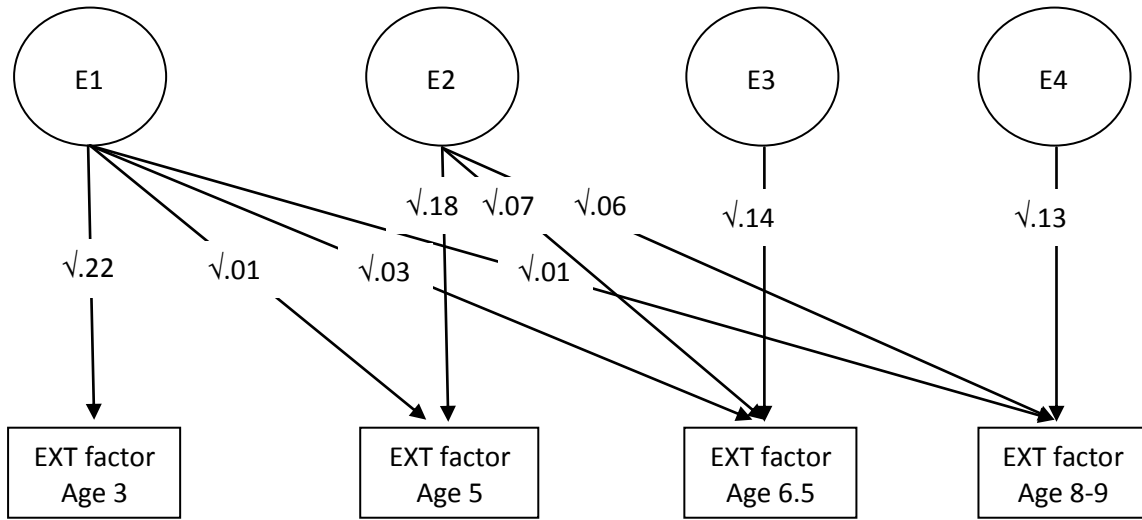



855 C. The specific/residualized internalizing factor, ADE model.

856

857

858

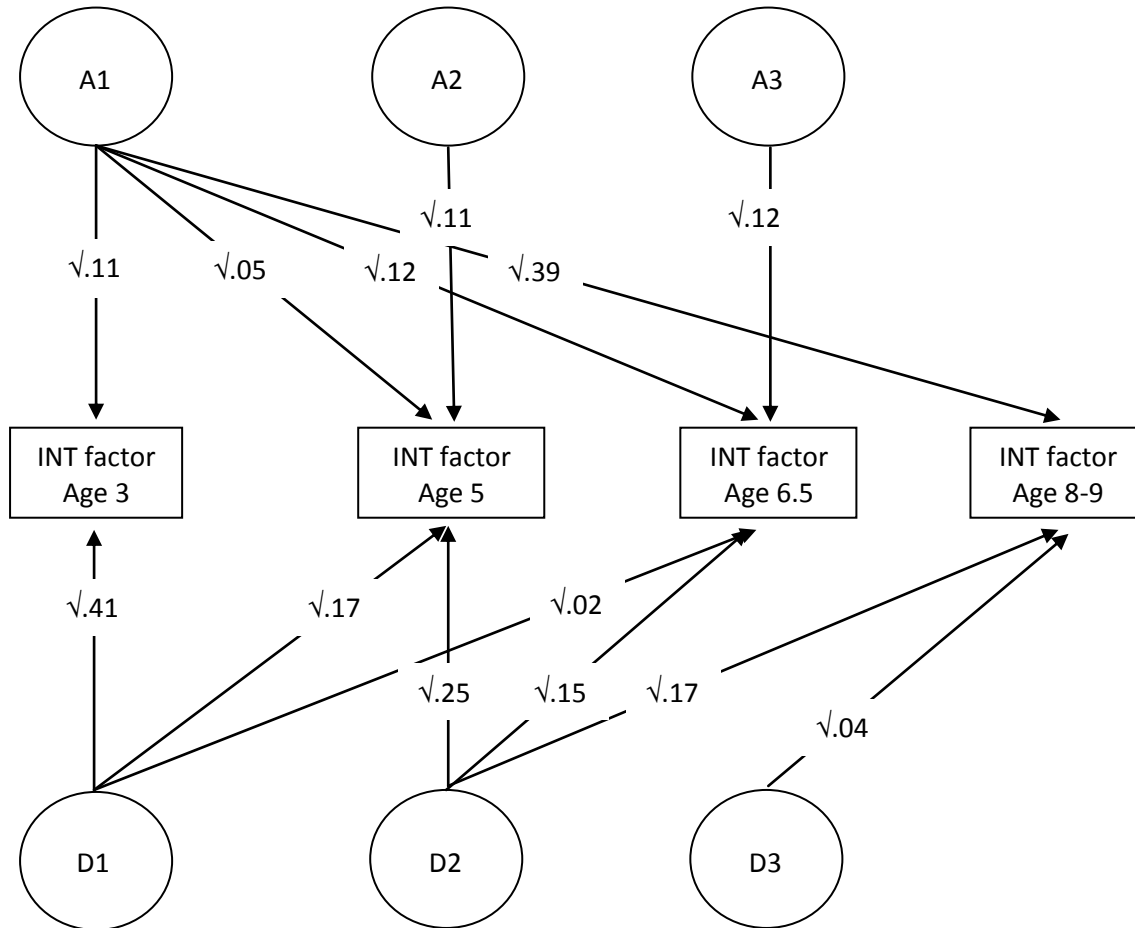

859 C. continued. The specific/residualized internalizing factor.

860

861

862

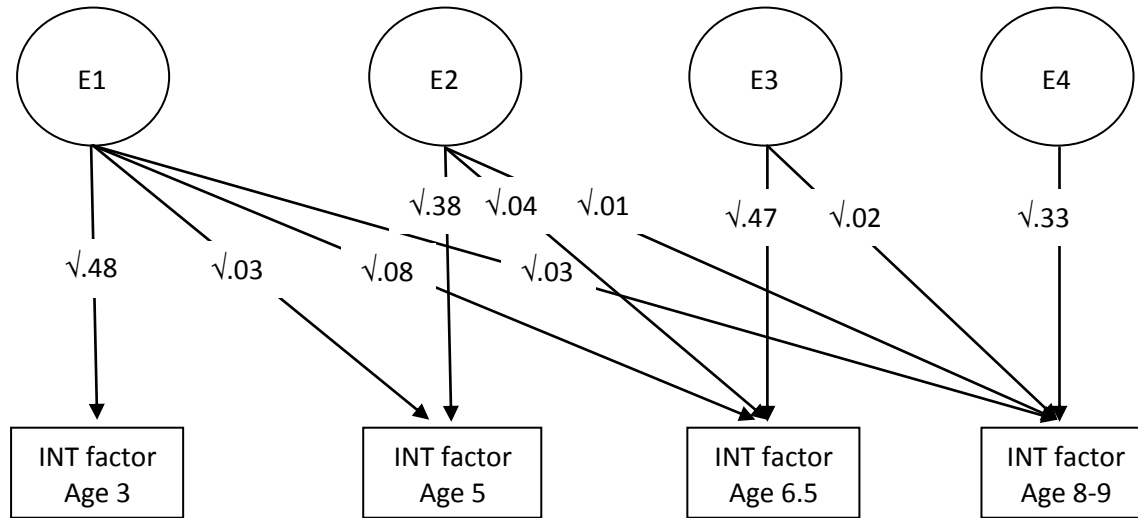

863 **Figure 3.** The psychopathology factors as predictors of developmental problems, self-esteem, and well-being, including error bars.

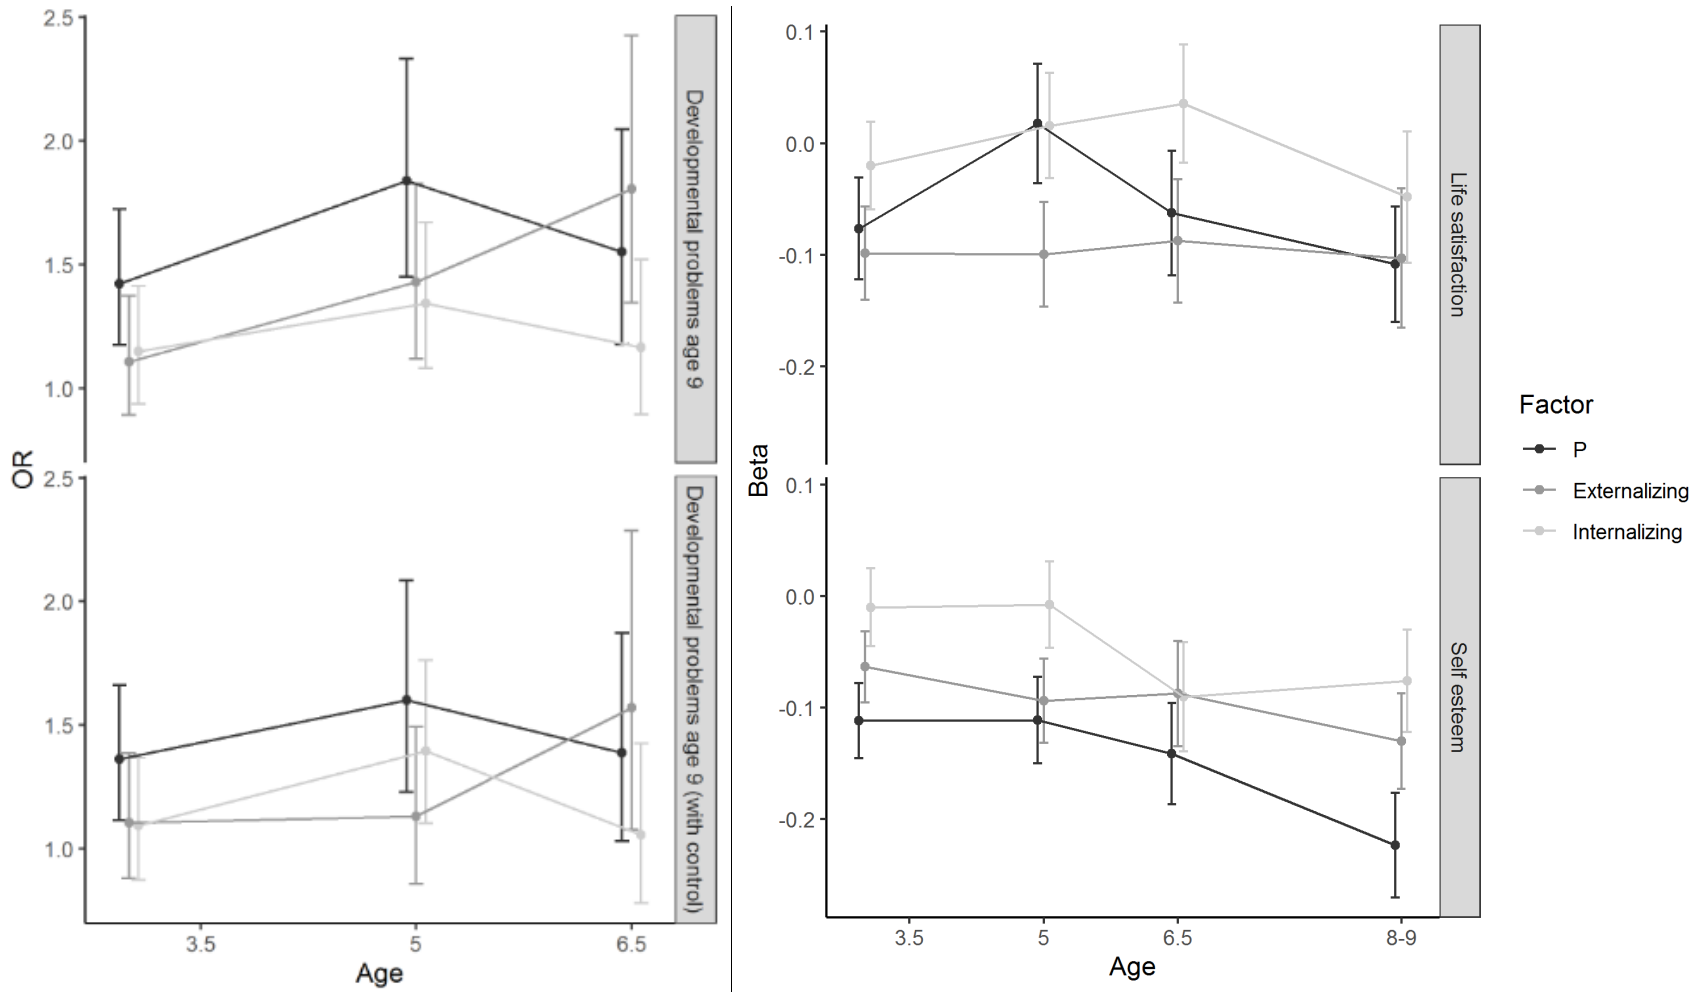

865 *Note.* In all models age, sex (coded as 1=males, 2=female), and socioeconomic status as assessed at age 3 were entered as covariates. Results of  
866 generalized estimating equation models are presented. All models are independent (i.e., each factor was examined as a predictor in an independent  
867 statistical model). The model "with control" also included a developmental problems (yes/no) measure, assessed at the same age as the tested factor, as a  
868 covariate. Error bars are based on the standard errors.
